# Supplementary material for: Nodal and churchill1 position the expression of a notch ligand during Xenopus germ layer segregation
Source: Life Sci Alliance. 2022 Sep 30;5(12):e202201693. doi: 10.26508/lsa.202201693 (PMC9604498; doi:10.26508/lsa.202201693)
Supplement: Supplementary file 1 [file LSA-2022-01693_TableS1.xlsx]

## Sheet: TGFß-Nodal
Pathway	Target Gene	Gene alternative names	Gene function	Gene expression domain	Gene activation stage	Transcription factor involved (Nodal pathway)	Binding Evidence	Regulation Evidence				Activate or Repress?	Direct Target	Strength of Connection
								Gain-of-Function	Loss-of-Function	Dominant Negative	Protein Synthesis Inhibition
TGFβ/Activin-Nodal
	dll1 (delta-like 1)	delta1	Membrane-bound ligand for Notch receptors	Gastrulation: IMZ (preinvoluted) (Wittenberger et al., 1999) (López et al., 2005).	Maternal: Eggs (RNAseq) (Session et al., 2016). Zygotic: ~NF9 (RNAseq) (Session et al., 2016; Xenbase) ~NF10.5 (ISH) (López et al., 2005).	Smad2/3 FoxH1	Foxh1 ChIP-seq (NF8, 9 and 10.5) (Chiu et al., 2014) (Charney et al. 2017a). At NF8, dll1 is co-bound by FoxH1 and TLE corepressor (ChIP seq) (Charney et al., 2017a), indicating possible repression by FoxH1/TLE. Small smad2/3 ChIP-seq peaks (NF10.5) in the same dll1 promoter region bound by FoxH1 at the same stage (see Figure S4, prepared from data obtained from Chiu et al., 2014; Xenbase).	Activin treatment of animal cap explants at NF9 for 3 hr. induced dll1 expression (RT-qPCR). Activin type II receptor expanded the IMZ dll1 domain in whole embryos (ISH, NF11) (Abe et al., 2004). Smad2CA represses dll1 cell autonomously in the IMZ and induces dll1 non-cell autonomously through Nodal signaling (ISH, gastrula stage; this work).	The Nodal receptor inhibitor SB431542 decreased dll1 expression at early gastrula (RNAseq) (Chiu et al. 2014). foxH1 MO downregulated dll1 (early gastrula, RNAseq) (Chiu et al. 2014). cer-S downregulated dll1 in the IMZ (ISH, gastrula stage; this work).	dn Activin type II receptor suppressed dll1 expression throughout the IMZ (ISH, NF11) (Abe et al., 2004).		Activates/represses (depending on cell-context). dll1 behaves similarly to tbxt in response to smad2CA (this work), suggesting a repression with high Nodal/Smad2 activity and activation with lower Nodal/Smad2 activity.	Putative direct	Binding evidence: (+) Regulation evidence: +++
	hes4 (hes family bHLH transcription factor 4)	hairy2	bHLH-Orange transcriptional repressor	Late blastula (NF9.5): animal hemisphere (Aguirre et al., 2013). Gastrulation: NIMZ (López et al., 2005) (Aguirre et al., 2013); presumptive DML: prechordal mesoderm and floor plate precursors (Tsuji et al., 2003) (López et al., 2005); neural plate border (presumptive neural crests) (Tsuji et al., 2003) (Vega López et al., 2015).	Maternal: Peak during oogenesis, lower expression in eggs (RNAseq) (Session et al., 2016; Xenbase). Zygotic: ~NF8 (RNAseq) (Session et al., 2016; Xenbase); ~NF10 (Northern blot) (Tsuji et al., 2003).	Smad2/3 FoxH1	Smad2/3: ChIP-seq (NF10.5) (Chiu et al., 2014) (Wills and Baker, 2015). Foxh1 ChIP-seq (NF8, 9 and 10.5) (Chiu et al., 2014) (Charney et al. 2017a). At NF8, hes4 is co-bound by FoxH1 and TLE corepressor (ChIP seq) (Charney et al., 2017a), indicating possible repression by FoxH1/TLE. At NF10.5 hes4 is co-bound by FoxH1 and Smad2/3 (ChIP-seq) (Chiu et al., 2014; Charney et al., 2017b), indicative o…	Ventral injections of activin, nodal1, or nodal2 mRNA induce ectopic expression of hes4 in whole embryos (NF10.5, ISH) (Yamaguti et al., 2005). smad2CA represses hes4 cell autonomously in the NIMZ and induces hes4 non-cell autonomously through Nodal signaling (ISH, gastrula stage; this work).	cer-S downregulated hes4 in the NIMZ (ISH, gastrula stage; this work).			Activates/represses (depending on cell-context). hes4 behaves similarly to tbxt in response to smad2CA (this work), suggesting a repression with high Nodal/Smad2 activity and activation with lower Nodal/Smad2 activity.	Direct	Binding evidence: + Regulation evidence: ++
	myod1 (myogenic differentiation 1)		bHLH transcription factor	Gastrulation: non-organizer IMZ, involuted paraxial mesoderm (Frank and Harland, 1991).	Maternal: Oogenesis, peaks in eggs (RNAseq) (Session et al., 2016; Xenbase). Zygotic: ~NF10 (RNAseq) (Session et al., 2016; Xenbase); (Northern blot) (Hopwood et al., 1989); ISH (Frank and Harland, 1991).	Smad2/3 FoxH1	Two regions near the myod1 gene scaffold (gene model incomplete) with Smad2/3 ChIP-seq peaks (NF10.5) are also bound by FoxH1 at the same stage (see Figure S5 prepared from data obtained from Chiu et al., 2014).	Activin treatment of animal cap explants induces myod1 (RNAse protection assay) (Harvey, 1991); (RT-qPCR) (Steinbach et al., 1998).	The Nodal receptor inhibitor SB431542 decreased myod1 expression at early gastrula (RNAseq) (Chiu et al. 2014).		Induction of myod1 by Activin in animal cap explant is sensitive to CHX treatment (RNAse protection assay) (Harvey, 1991); (RT-qPCR) (Steinbach et al., 1998).	Activates	Putative direct?	Binding evidence: (+) Regulation evidence: ++, CHX-
	nodal1 (nodal homolog 1)	Xnr1	Transforming growth factor β related protein	NF9: Vegetal>Marginal; Dorsal>Ventral (Jones et al., 2005; Agius et al., 2000). NF10/10.5: DMZ>VMZ (Jones et al, 1995; Steiner et al., 2006; Zamparini et al., 2006).	Zygotic: ~NF8 (RNAseq) (Session et al., 2016; Xenbase); ~NF8.5 (RT-PCR) (Takahashi et al., 2000).	Smad2/3 FoxH1	Smad2/3: EMSA (NF9-9.5) and gene reporter assays (NF10.5) (Osada et al., 2000). Smad2/3: ChIP-qPCR (early gastrula) (Reid et al., 2016); ChIP-seq (NF10.5) (Chiu et al., 2014) (Wills and Baker, 2015). FoxH1: EMSA (NF9-9.5) and gene reporter assays (NF10,5) (Osada et al., 2000). Foxh1 ChIP-seq (NF8, 9 and 10.5) (Chiu et al., 2014) (Charney et al. 2017a). At NF8, nodal1 is co-bound by FoxH1 and TLE …	nodal5, nodal6 induce nodal1 in animal caps (gastrula, RT-PCR) (Takahashi et al., 2002). foxh1 overexpression repressed nodal1 (blastula stage, RT-qPCR) (Reid et al., 2016).	cer-S downregulated nodal1 in whole embryos (NF10, RT-PCR) and suppressed nodal1 induction by nodal5 or nodal6 in animal caps (gastrula, RT-PCR) (Takahashi et al., 2000). The Nodal receptor inhibitor SB431542 decreased nodal1 expression at early gastrula (RNAseq) (Chiu et al. 2014). Nodal5 MO + Nodal6 MO downregulated nodal1 (NF10; ISH, RT-qPCR) (Luxardi et al., 2010). foxH1 MO downregulated noda…	dn Activin type II receptor decreased nodal1 expression in vegetal explants (NF10, RT-PCR) (Yasuo and Lemaire, 1999) and in whole embryos (NF9, RT-PCR) (Takahashi et al., 2000). dn Activin type II receptor suppressed nodal1 induction by nodal5 or nodal6 in animal caps (gastrula, RT-PCR) (Takahashi et al., 2000). foxh1-EnR prevented induction of nodal1 by Activin in animal caps (NF10.5, RT-PCR) (O…		Activates In the presence of Nodal signaling, Foxh1 activates nodal1 when complexed with Smad2/3 (Reid et al,, 2016) (Charney et al. 2017b). In the absence of Nodal signaling, Foxh1 binds the co-repressor TLE4 and this complex represses nodal1 (Reid et al., 2016), (Charney et al., 2017b).	Direct	Binding evidence: + Regulation evidence: +++
	nodal2 (nodal homolog 2)	Xnr2	Transforming growth factor β related protein	NF9: Vegetal>Marginal; Dorsal>Ventral (Jones et al., 2005; Agius et al., 2000). NF10/10.5: DMZ>VMZ; endoderm (Jones et al, 1995; Steiner et al., 2006; Zamparini et al., 2006).	Zygotic: ~NF8 (RNAseq) (Session et al., 2016; Xenbase); ~NF8.5 (RT-PCR) (Takahashi et al., 2000).	Smad2/3 FoxH1	Smad2/3: ChIP-seq (NF10.5) (Chiu et al., 2014). Foxh1 ChIP-seq (NF8, 9 and 10.5) (Chiu et al., 2014) (Charney et al. 2017b). At NF8, nodal2 is co-bound by FoxH1 and TLE corepressor (ChIP seq) (Charney et al., 2017a), indicating possible repression by FoxH1/TLE. At NF10.5 nodal2 is co-bound by FoxH1 and Smad2/3 (ChIP-seq) (Chiu et al., 2014; Charney et al., 2017a), indicative of direct activation …	nodal5, nodal6 induce nodal2 in animal caps (gastrula, RT-PCR) (Takahashi et al., 2002).	cer-S downregulated nodal2 in whole embryos (NF10, RT-PCR) and suppressed nodal2 induction by nodal5 or nodal6 in animal caps (gastrula, RT-PCR) (Takahashi et al., 2000). The Nodal receptor inhibitor SB431542 decreased nodal2 expression at early gastrula (RNAseq) (Chiu et al. 2014). nodal5 MO + nodal6 MO downregulated nodal2 (NF10; ISH, RT-qPCR) (Luxardi et al., 2010). foxH1 MO downregulated noda…	dn Activin type II receptor decreased nodal2 expression in vegetal explants (NF10, RT-PCR) (Yasuo and Lemaire, 1999) and and in whole embryos (NF9, RT-PCR) (Takahashi et al., 2000). dn Activin type II receptor suppressed nodal2 induction by nodal5 or nodal6 in animal caps (gastrula, RT-PCR) (Takahashi et al., 2000). foxh1-EnR prevented induction of nodal2 by Activin in animal caps (NF10.5, RT-PCR…		Activates	Direct	Binding evidence: + Regulation evidence: +++
	nodal4 (nodal homolog 4)	Xnr4	Transforming growth factor β related protein	NF9: Vegetal>Marginal (Agius et al., 2000). NF10/10.5: DMZ (Joseph and Melton, 1997).	Zygotic: ~NF9 (RT-PCR) (Takahashi et al,, 2000); RNAseq (Session et al., 2016; Xenbase).	Smad2/3 FoxH1	A strong Smad2/3 ChIP-seq peak in the same nodal4 region bound by FoxH1 at NF10.5 (see Figure S6, prepared from data obtained from Chiu et al., 2014; Xenbase), indicative of direct activation by Nodal signaling.		cer-S decreased nodal4 expression (NF11, microarray, RT-qPCR) (Sinner et al., 2006).			Activates	Direct	Binding evidence: + Regulation evidence: +
	nodal5 (nodal homolog 5)	Xnr5	Transforming growth factor β related protein	NF9: Vegetal; D>V (Takahashi et al., 2000; Reid et al., 2016). NF10/10.5: Dorsal vegetal (Zamparini et al., 2006).	Zygotic: ~NF7 (RT-PCR) (Yang et al., 2002); RT-qPCR (Skirkanich et al., 2011).			Nodal6 induced nodal5 (NF8, ISH, RT-qPCR) (Skirkanich et al., 2011). GR-tSMAD2 + Dex NF6 (2 hs) induced nodal5 (ISH) (Skirkanich et al., 2011). foxh1 overexpression repressed nodal5 (blastula stage, ISH, RT-qPCR) (Reid et al., 2016).	The Nodal receptor inhibitor SB505124 decreased nodal5 expression (NF8.5, ISH) (Skirkanich et al., 2011). Maternal depletion of foxH1 mRNA with a phosphorothioate antisense oligonucleotide increased nodal5 expression (RT-qPCR, ISH; late blastula/early gastrula) (Kofron et al., 2004).	dn ALK4 (dn Nodal receptor) decreased the number of nodal5+ cells (NF8.5, ISH) (Skirkanich et al., 2011).		Nodal activates But repressed by FoxH1		Regulation evidence (Nodal pathway): +++ FoxH1: ++
	nodal6 (nodal homolog 6)	Xnr6	Transforming growth factor β related protein	NF9: Vegetal; D>V (Takahashi et al., 2000; Reid et al., 2016). NF10/10.5: Dorsal vegetal (Zamparini et al., 2006).	Zygotic: ~NF7 (RT-PCR) (Yang et al., 2002); RT-qPCR (Skirkanich et al., 2011).			Nodal5 induced nodal6 (NF8, ISH, RT-qPCR) (Skirkanich et al., 2011). GR-tSMAD2 + Dex NF6 (2 hs) induced nodal6 (ISH) (Skirkanich et al., 2011). foxh1 overexpression repressed nodal6 (blastula stage, ISH, RT-qPCR) (Reid et al., 2016).	The Nodal receptor inhibitor SB505124 decreased nodal6 expression (NF8.5, ISH) (Skirkanich et al., 2011). Maternal depletion of foxH1 mRNA with a phosphorothioate antisense oligonucleotide increased nodal6 expression (RT-qPCR, ISH; late blastula/early gastrula) (Kofron et al., 2004).	dn ALK4 (dn Nodal receptor) decreased the number of nodal6+ cells (NF8.5, ISH) (Skirkanich et al., 2011).		Nodal activates But repressed by FoxH1		Regulation evidence (Nodal pathway): +++ FoxH1: ++
	notch1 (notch 1 receptor)		Trans-membrane receptor for membrane-bound ligands of the Delta/Jagged family	Gastrulation: MZ (ISH) (López et al-. 2003) (Miazga et al., 2009); ectoderm, mesoderm and endoderm (RNAse protection) (Coffman et al., 1990).	Maternal: Eggs (RNAseq) (Session et al., 2016); RNAse protection (Coffman et al., 1990). Zygotic: ~NF8 (RNAseq) (Session et al., 2016) (Xenbase), RNAse protection (Coffman et al., 1990).	Smad2/3 FoxH1	Several Smad2/3 ChIP-seq peaks are found in the same regions of the notch1 gene bound by FoxH1 (ChIP-seq) (see Figure S7, prepared from data obtained from Chiu et al, 2014; Xenbase), indicative of direct regulation by Nodal signaling.	Treatment with Activin at NF9 induced notch1 expression in animal caps (after 3 hr. of treatment, RT-qPCR) (Abe et al., 2004).				Activates	Putative direct	Binding evidence: + Regulation evidence: +
	smad2 (SMAD family member 2)		Signal transduction/ transcritpion factor for TGFβ pathway	•ISH: Gastrulation: smad2 mRNA in ectoderm, mesoderm and endoderm (Hill, 2001). •IF of nuclear P-Smad2 (Schohl and Fagotto, 2002): NF8.5: transient increase in supraequatorial ring NF9-9.5: increase in vegetal hemisphere, starting dorsally NF10-11: highest levels in the endoderm, moderate levels in the MZ. NF12: decreases throughout the embryo.	Maternal: Oogenesis and Eggs (RNAseq) (Session et al., 2016). Zygotic: ~NF8 (RNAseq) (Session et al., 2016) (Xenbase).			Nodal5 induced Smad2-GFP protein nuclearization (Skirkanich et al., 2011).
	sox2 (SRY-box 2)		HMG-box transcription factor	Gastrulation: neural ectoderm (Mizuseki et al., 1998).	Zygotic: ~NF9 (RNAseq) (Session et al., 2016; Xenbase). ~NF10.5 (ISH) (Mizuseki et al., 1998).	Smad2/3 FoxH1	Smad2/3: ChIP-seq (NF10.5). Smad2/3 occupancy shifted to another position after E2a depletion with E2a MO (Willis and Baker. 2015), which might indicate that normally, E2a prevents up-regulation of sox2 by Nodal signaling . Foxh1 ChIP-seq (NF8, 9) (Charney et al. 2017a). At NF8, sox2 is co-bound by FoxH1 and TLE corepressor (ChIP seq) (Charney et al., 2017a), indicating possible repression by Fox…	smad2CA represses sox2 cell autonomously (ISH, gastrula stage; this work).	The Nodal receptor inhibitor SB431542 decreased sox2 expression at early gastrula (RNAseq) (Chiu et al. 2014). foxH1 MO downregulated sox2 (early gastrula, RNAseq) (Chiu et al. 2014).			Binding evidence and the response to smad2CA suggest repression. Loss of function experiments probably indicate dependence of mesodermal signaling for maintaining sox2 expression.
	sox17a/b (SRY-box 17 α and β genes)		HMG-box transcription factor	Gastrulation: vegetal + IMZ endoderm (Hudson et al., 1997).	Zygotic: ~NF8 (RT-PCR) (Yasuo and Lemaire, 1999). ~NF9 (RNAseq) (Session et al., 2016; Xenbase). ~NF9/10 (ISH) (Rousso et al., 2011) (Bates et al., 2013).	Smad2/3 FoxH1	sox17b: Foxh1 ChIP-seq (NF8, 9 and 10.5) (Chiu et al., 2014) (Charney et al. 2017a). At NF10.5, sox17b is co-bound by FoxH1 and Smad2/3 (ChIP-seq) (Chiu et al., 2014; Charney et al., 2017a), indicative of direct activation by Nodal signaling.	Activin treatment of animal cap explants induced sox17a/b (RT-PCR, NF9.5) (Clements et al., 1999); (RT-PCR, NF10.5) (Hudson et al., 1997); (RT-qPCR, NF11) (Sinner et al., 2004). sox17 induction required higher doses of Activin than tbxt induction (animal caps, RT-PCR, NF11.5) (Weber et al., 2000). Nodal1, 2, 4, 5 or 6 induced sox17a/b in animal caps (gastrula stage, RT-PCR) (Clements et al., 1999…	The Nodal receptor inhibitor SB505124 and the Nodal antagonist Lefty decreased sox17a expression (early gastrula, ISH, RT-qPCR). Treatments with SB505124 indicate that endoderm induction ends at NF9 (Luxardi et al., 2010) (Skirkanich et al., 2011). The Nodal receptor inhibitor SB431542 decreased sox17a expression at early gastrula (ISH) (Cao et al. 2012); (RNAseq) (Chiu et al. 2014). cer-S decrea…	dn Activin type I receptor decreased sox17a expression (NF10.5, ISH) (Cao et al., 2012). dn ALK4 (dn Nodal receptor) downregulated sox17a (NF10, ISH) (Skirkanich et al., 2011). nodal5-KDEL suppressed sox17 expression (NF9, RT-PCR) (Matsukawa et al., 2012). foxh1-EnR prevented induction of sox17a/b by Activin in animal caps (NF10.5, RT-PCR) (Watanabe and Whitman, 1999). Marginal injection of foxh1…	Induction of sox17a by Activin treatment of animal caps is unaffected by CHX (RT-qPCR, NF11) (Sinner et al., 2004).	Activates at high levels of Nodal signaling.	Direct (sox17b)	Binding evidence: + Regulation evidence: +++, CHX+
	tbxt (T-box transcription factor T)	brachyury, Xbra, t	T-box transcription factor	Late blastula (NF9.5): MZ (Aguirre et al., 2013). Gastrulation: Presumptive pre-involuted and involuting mesoderm in the IMZ. After involution, expression only persists in the notochord (Smith et al., 1991) (Essex et al., 1993) (Aguirre et al., 2013).	Maternal: Low levels (RNAse protection) (Smith et al., 1991). Zygotic: ~NF9-10 (RNAseq) (Session et al., 2016; Xenbase); RNAse protection (Smith et al., 1991).	Smad2/3 FoxH1	Gene reporter assay: induction by low doses of Activin but not by high doses of Activin (Latinkic et al., 1997). FoxH1 ChIP-seq (NF8,NF9) (Charney et al., 2017a); (NF10.5) (Chiu et al., 2014). ChIP-seq (NF10.5): tbxt is co-bound by FoxH1 and Smad2/3, indicative of direct activation by Nodal signaling (data from Chiu et al. 2014; see Figure S8). ChIP-seq (NF10.5); robust expression of tbxt require…	tbxt is induced by low doses of Activin but not by high doses (animal cap, RNAse protection, NF10, NF12.5) (Gurdon et al., 1994) (Latinkic et al., 1997); (animal cap, RT-PCR) (Weber et al., 2000). tbxt is induced close to beads soaked with low doses of Activin and further away from beads soaked bith high doses of Activin, whereas the gap is filled with gsc expression (animal caps, NF10-10.75, ISH…	cer-S suppressed tbxt expression at blastula stage (RT-PCR) and throughout the IMZ (gastrula, ISH) (Piccolo et al., 1999) (Agius et al., 2000) (Matsukawa et al., 2012). The Nodal receptor inhibitor SB505124 and the Nodal antagonist Lefty decreased tbxt expression (early gastrula, ISH, RT-qPCR). Treatments with SB505124 indicate that mesoderm induction ends at NF9 (Luxardi et al., 2010) (Skirkanic…	dn Activin type I receptor decreased tbxt expression (NF10.5, ISH) (Cao et al., 2012). dn ALK4 (dn Nodal receptor) downregulated tbxt (NF10, ISH) (Skirkanich et al., 2011). nodal5-KDEL suppressed tbxt expression (NF9, RT-PCR; NF11, ISH) (Matsukawa et al., 2012). dn-nodal2 blocked tbxt induction by nodal1, 2 or 3 in animal caps (NF10.5, RT-PCR) (Osada and Wright, 1999). foxh1-EnR prevented inducti…	Activin induces tbxt in animal caps, even in the presence of CHX (NF10.5, RT-PCR) (Watanabe and Whitman, 1999). GR-foxH1-VP16 (+Dex, +CHX) induced tbxt in animal caps (NF10.5, RT-PCR) (Watanabe and Whitman, 1999).	Activates at low but represses/does not activate at high levels of Nodal signaling	Direct	Binding evidence: + Regulation evidence: +++, CHX+
	zeb2 (zinc finger E-box binding homeobox 2)	sip1	δEF1/Zfh-1 two-handed Zinc finger-Homeodomain transcriptional repressor	Gastrulation: Dorsal ectoderm (presumptive neural ectoderm) from NF10.5 (ISH) (Eisaki et al., 2000) (Van Grunsven et al., 2000) (Papin et al., 2002).	Zygotic: ~NF9 (endpoint RT-PCR) (Eisaki et al. 2000)/NF10 (RNAseq) (Session et al., 2016; Xenbase) (RNAse protection, Van Grunsven et al., 2000). ~NF10.5 (ISH) (Eisaki et al., 2000).	FoxH1	FoxH1 ChIP-seq (NF8,NF9) (Charney et al., 2017a). At NF8, zeb2 is co-bound by FoxH1 and TLE corepresssor (ChIP seq) (Charney et al., 2017a), indicating possible repression by FoxH1/TLE.		The Nodal receptor inhibitor SB431542 decreased zeb2 expression at early gastrula (RNAseq) (Chiu et al. 2014). foxH1 MO downregulated zeb2 (early gastrula, RNAseq) (Chiu et al. 2014).

## Sheet: Notch
Pathway	Target gene	Alternative names	Function	Gene expression domain	Gene activation stage	Binding Evidence	Regulation Evidence				Activate or Repress?	Direct Target	Strength of Connection
							Gain-of-Function	Loss-of-Function	Dominant Negative	Protein Synthesis Inhibition
DSL/Notch/rbpj/hes
	hes4 (hairy2)/ bHLH-O transcription factor	hairy2	bHLH-Orange transcriptional repressor	Late blastula (NF9.5): animal hemisphere (Aguirre et al., 2013). Gastrulation: NIMZ (López et al., 2005) (Aguirre et al., 2013); presumptive DML: prechordal mesoderm and floor plate precursors (Tsuji et al., 2003) (López et al., 2005); neural plate border (presumptive neural crests) (Tsuji et al., 2003) (Vega López et al., 2015).	Maternal: Peak during oogenesis, lower expression in eggs (RNAseq) (Session et al., 2016; Xenbase). Zygotic: ~NF8 (RNAseq) (Session et al., 2016; Xenbase); ~NF10 (Northern blot) (Tsuji et al., 2003).	In vivo gene reporter: a paired RBPJ motif present in the proximal promoter of hes4 is necessary and sufficient for the normal expression of hes4 in most of its domains (transgenic embryos, NF26-31) (Davis et al., 2001). Notch1-ChIP assay (NF25): Notch1 occupies the RBPJ site of the hes4 genomic loci (Sakano et al., 2010).	nicd1 expands the hes4 domain (DNIMZ/FP precursors) in the organizer (gastrulae) (López et al., 2005) and in the NIMZ outside the organizer region (this work). Overexpression of dll1 increases the number of the hes4+ cells in the organizer (López et al., 2005) and in the NIMZ outside the organizer region (this work).	notch1 MO decreases hes4 expression in the NIMZ (this work).	rbpjDBM and dll1STU reduce the hes4 domain (DNIMZ/FP precursors) in the organizer (gastrulae) (López et al., 2005) and in the NIMZ outside de gastrula organizer region (this work).		Dll1/Notch1/Rbpj activates hes4 in the NIMZ	Direct	Binding evidence Notch1/Rbpj: + Regulation evidence dll1/notch1/rbpj: +++
	myod1 (myogenic differentiation 1)		bHLH transcription factor	Gastrulation: non-organizer IMZ, involuted paraxial mesoderm (Frank and Harland, 1991).	Maternal: Oogenesis, peaks in eggs (RNAseq) (Session et al., 2016; Xenbase). Zygotic: ~NF10 (RNAseq) (Session et al., 2016; Xenbase); (Northern blot) (Hopwood et al., 1989); ISH (Frank and Harland, 1991).		Overexpression of hes4 suppressed myod1 in the IMZ (ISH, gastrula stage) (Cui et al., 2005).				hes4 represses myod1 in the MZ		Regulation evidence hes4: +
	sox2 (SRY-box 2)		HMG-box transcription factor	Gastrulation: neural ectoderm (Mizuseki et al., 1998).	Zygotic: ~NF9 (RNAseq) (Session et al., 2016; Xenbase). ~NF10.5 (ISH) (Mizuseki et al., 1998).		nicd1 expands sox2 expression towards the IMZ (NF11, ISH) (Revinski et al., 2010).	notch1 MO decreases sox2 expression in the NIMZ (NF11, ISH) (Revinski et al., 2010).	dll1STU decreases sox2 expression in the NIMZ (NF11, ISH) (Revinski et al., 2010).		Dll1/Notch1 activates sox2 in the NIMZ		Regulation evidence dll1/notch1: +++
	sox17a (SRY-box 17 α)		HMG-box transcription factor	Gastrulation: vegetal + IMZ endoderm (Hudson et al., 1997).	Zygotic: ~NF8 (RT-PCR) (Yasuo and Lemaire, 1999). ~NF9 (RNAseq) (Session et al., 2016; Xenbase). ~NF9/10 (ISH) (Rousso et al., 2011) (Bates et al., 2013).		nicd1 expands the sox17a IMZ domain at the expense of the tbxt IMZ domain (NF11, ISH) (Revinski et al., 2010).	notch1 MO reduces the sox17a IMZ domain (NF11, ISH) (Revinski et al., 2010)	dll1STU expands the IMZ sox17a domain at the expense of the mesodermal/tbxt domain (NF11, ISH) (Revinski et al., 2010).		DSL Ligand?/Notch1: activates sox17a in the endodermal lineage of the IMZ. Dll1: negative regulation of sox17a in the NIMZ.		Regulation evidence dll1/notch1: +++
	tbxt (T-box transcription factor T)	brachyury, Xbra, T	T-box transcription factor	Late blastula (NF9.5): MZ (Aguirre et al., 2013). Gastrulation: Presumptive pre-involuted and involuting mesoderm in the IMZ. After involution, expression only persists in the notochord (Smith et al., 1991) (Essex et al., 1993) (Aguirre et al., 2013).	Maternal: Low levels (RNAse protection) (Smith et al., 1991). Zygotic: ~NF9-10 (RNAseq) (Session et al., 2016; Xenbase); RNAse protection (Smith et al., 1991).	Putative RBPJ binding site (Latinkic et al., 1997).	Injection of nicd1 mRNA directed to the IMZ reduces the tbxt domain (NF11, ISH) (Revinski et al., 2010). Overexpression of hes4 suppressed tbxt in the IMZ (gastrula stage, ISH) (Cui et al., 2005), (López et al., 2005), (Aguirre et al., 2013).	notch1 MO expands the tbxt IMZ domain at the expense of the sox17a IMZ domain and sox2 expression in the NIMZ (NF11, ISH) (Revinski et al., 2010) dll1MO decreases circumblastoporal tbxt expression (vegetal view, NF10.5, ISH) (Kinoshita et al., 2011). hes4 MO expanded the IMZ tbxt domain towards the NIMZ (NF10.5, ISH) (López et al., 2005) (Aguirre et al., 2013).	dll1STU decreases the circumblastoporal expression of tbxt, shifting and expanding its domain at the expense of the neural/sox2 domain (NF11, ISH) (Revinski et al., 2010).		Dll1/Notch1/Hes4: represses tbxt in the NIMZ. DSL ligand?/Notch1: represses tbxt in the endodermal lineage of the IMZ.		Regulation evidence: dll1/notch1/hes4 +++

## Sheet: churc1
Transcription factor	Alternative Names	Function	Expression domain	Activation stage	Target gene	Alternative names	Gene function	Gene expression domain	Gene activation stage	Binding Evidence	Regulation Evidence				Activate or Repress?	Direct Target	Strength of Connection
											Gain-of-Function	Loss-of-Function	Dominant Negative	Protein Synthesis Inhibition
churc1 (churchill domain containing 1)		Zinc-finger transcriptional activator	Mid-blastula (NF8), late blastula (NF9): dorsal half of the animal hemisphere (ISH) (this work). Gastrulation: presumptive neurectoderm (ISH) (this work).	Maternal: Eggs (RNAseq) (Session et al., 2016). Zygotic: ~NF8 (RNAseq) (Session et al., 2016; Xenbase); ISH (this work).
					dll1 (delta-like 1)	delta1	Membrane-bound ligand for Notch receptors	Gastrulation: IMZ (preinvoluted) (Wittenberger et al., 1999) (López et al., 2005).	Maternal: Eggs (RNAseq) (Session et al., 2016). Zygotic: ~NF9 (RNAseq) (Session et al., 2016; Xenbase) ~NF10.5 (ISH) (López et al., 2005).		churc1VP16 or churc1 suppressed dll1 expression at gastrula stage (ISH) (this work).	churc1 MO expanded dll1 expression at gastrula stage (ISH) (this work).	churc1EnR expanded dll1 expression at gastrula stage (ISH) (this work).		Represses	Probably indirect	Regulation evidence: +++
					not (notochord homeobox)		Homeodomain transcriptional repressor	NF9: not localized (ISH, von Dassow et al., 1993). Gastrulation: gastrula organizer, limit of involution (ISH, von Dassow et al., 1993).	Maternal (RNAseq; Session et al., 2016; Xenbase), (Northern blot, von Dassow et al., 1993). Zygotic: MBT (RNAse protection) (von Dassow et al., 1993); ~NF8-9 (RNAseq, Session et al., 2016).		churc1VP16 suppressed not expression at gastrula stage (ISH) (this work).		churc1EnR expanded not expression at gastrula stage (ISH) (this work).		Represses	Probably indirect	Regulation evidence: ++
					sox2 (SRY-box 2)		HMG-box transcription factor	Gastrulation: neural ectoderm (Mizuseki et al., 1998).	Zygotic: ~NF9 (RNAseq) (Session et al., 2016; Xenbase). ~NF10.5 (ISH) (Mizuseki et al., 1998).		churc1VP16 suppressed sox2 expression at gastrula stage (ISH) (this work). churc1 overexpression produced two phenotypes in similar proportions at gastrula stage (ISH) (this work): 1) expansion of the sox2 domain; 2) reduction of the sox2 domain.	churc1 MO reduced sox2 expression at gastrula stage (ISH) (this work).	churc1EnR suppressed sox2 expression at gastrula stage (ISH) (this work).		Activates (see Discussion)		Regulation evidence: ++
					sox17a/b (SRY-box 17 α and β genes)		HMG-box transcription factor	Gastrulation: vegetal + IMZ endoderm (Hudson et al., 1997).	Zygotic: ~NF8 (RT-PCR) (Yasuo and Lemaire, 1999). ~NF9 (RNAseq) (Session et al., 2016; Xenbase). ~NF9/10 (ISH) (Rousso et al., 2011) (Bates et al., 2013).		churc1VP16 suppressed sox17a expression at gastrula stage (ISH) (this work). churc1 reduced the extent of sox17a domain at gastrula stage (ISH) (this work).	churc1 MO expanded sox17a suprablastoporal expression at gastrula stage (ISH) (this work).	churc1EnR expanded sox17a suprablastoporal expression at gastrula stage (ISH) (this work).		Represses	Probably indirect	Regulation evidence: +++
					tbxt (T-box transcription factor T)	brachyury, Xbra, t	T-box transcription factor	Late blastula (NF9.5): MZ (Aguirre et al., 2013). Gastrulation: Presumptive pre-involuted and involuting mesoderm in the IMZ. After involution, expression only persists in the notochord (Smith et al., 1991) (Essex et al., 1993) (Aguirre et al., 2013).	Maternal: Low levels (RNAse protection) (Smith et al., 1991). Zygotic: ~NF9-10 (RNAseq) (Session et al., 2016; Xenbase); RNAse protection (Smith et al., 1991).		In animal cap assays, Xenopus churc1 and churc1VP16 prevented the induction of tbxt by eFGF added at blastula stage (RT-PCR) (Sheng et al., 2003). tbxt expression in the IMZ suppressed by churc1 (Sheng et al., 2003; this work) and by churc1VP16 (Sheng et al., 2003; this work) in Xenopus embryos at gastrula stage (ISH).	churc1 MO expanded tbxt expression towards the ectoderm at gastrula stage (ISH) (this work).	In animal cap assays, Xenopus churc1EnR did not prevent the induction of tbxt by eFGF added at blastula stage (RT-PCR) (Sheng et al., 2003). churc1EnR expanded tbxt expression towards the ectoderm at gastrula stage (ISH) (this work).		Represses	Probably indirect	Regulation evidence: +++
					zeb2 (zinc finger E-box binding homeobox 2)	sip1	δEF1/Zfh-1 two-handed Zinc finger-Homeodomain transcriptional repressor	Gastrulation: Dorsal ectoderm (presumptive neural ectoderm) from NF10.5 (ISH) (Eisaki et al., 2000) (Van Grunsven et al., 2000) (Papin et al., 2002).	Zygotic: ~NF9 (endpoint RT-PCR) (Eisaki et al. 2000)/NF10 (RNAseq) (Session et al., 2016; Xenbase) (RNAse protection, Van Grunsven et al., 2000). ~NF10.5 (ISH) (Eisaki et al., 2000).	In vitro binding analysis determined the putative binding consensus for Churc1 (Sheng et al., 2003). In silico analysis: 13 putative Churc1 binding sequences highly conserved between human and mouse ZEB2, clustered in a putative 480 bp enhancer immediately upstream of the translation start site. Two conspicuous peaks of high density of non-randomly distributed putative Churc1 binding sites in the…	churc1 overexpression upreguated zeb2 at gastrula stage (ISH) (this work)	churc1 MO downregulated zeb2 at gastrula stage (ISH) (this work). CHURC1 MO suppressed ZEB2 expression in chick embryos (ISH, HH9) (Sheng et al., 2003).			Activates	Putative direct	Binding evidence: (+) Regulation evidence: +++

## Sheet: myod1
Transcription factor	Alternative names	Function	Expression domain	Activation stage	Target gene	Gene alternative names	Gene function	Gene expression domain	Gene activation stage	Binding Evidence	Regulation Evidence				Activate or Repress?	Direct Target	Strength of Connection
											Gain-of-Function	Loss-of-Function	Dominant Negative	Protein Synthesis Inhibition
myod1 (myogenic differentiation 1)		bHLH transcription factor	Gastrulation: non-organizer IMZ, involuted paraxial mesoderm (Frank and Harland, 1991).	Maternal: Oogenesis, peaks in eggs (RNAseq) (Session et al., 2016; Xenbase). Zygotic: ~NF10 (RNAseq) (Session et al., 2016; Xenbase); (Northern blot) (Hopwood et al., 1989); ISH (Frank and Harland, 1991).
					dll1 (delta-like 1)	delta1	Membrane-bound ligand for Notch receptors	Gastrulation: IMZ (preinvoluted) (Wittenberger et al., 1999) (López et al., 2005).	Maternal: Eggs (RNAseq) (Session et al., 2016). Zygotic: ~NF9 (RNAseq) (Session et al., 2016; Xenbase) ~NF10.5 (ISH) (López et al., 2005).		myod1 overexpression induced ectopic dll1 expression throughout the animal hemisphere at gastrula stage (ISH, whole embryos) and in animal caps (RT-qPCR) (Wittenberger et al., 1999) (Abe et al., 2004).		myod1 (bHLH)–enR prevented dll1 induction by myod1 overexpression in animal caps (RT-qPCR) and suppressed dll1 in the IMZ at gastrula stage (NF11) in a cell-autonomous way (ISH, whole embryos) (Wittenberger et al., 1999).	GR-myod1 (Dex 9.5 hpf) induced dll1 in animal caps, even in the presence of CHX (RT-qPCR, NF12.5) (Wittenberger et al., 1999).	Activates dll1	putative direct	Regulation evidence: ++, CHX+

## Sheet: sox17
Transcription factor	Alternative Names	Function	Expression domain	Activation stage	Target gene	Alternative names	Gene function	Gene expression domain	Gene activation stage	Binding Evidence	Regulation Evidence				Activate or Repress?	Direct Target	Strength of Connection
											Gain-of-Function	Loss-of-Function	Dominant Negative	Protein Synthesis Inhibition
sox17a/b (SRY-box 17 α and β genes)		HMG-box transcription factor	Gastrulation: vegetal + IMZ endoderm (Hudson et al., 1997).	Zygotic: ~NF8 (RT-PCR) (Yasuo and Lemaire, 1999). ~NF9 (RNAseq) (Session et al., 2016; Xenbase). ~NF9/10 (ISH) (Rousso et al., 2011) (Bates et al., 2013).
					myod1 (myogenic differentiation 1)		bHLH transcription factor	Gastrulation: non-organizer IMZ, involuted paraxial mesoderm (Frank and Harland, 1991).	Maternal: Oogenesis, peaks in eggs (RNAseq) (Session et al., 2016; Xenbase). Zygotic: ~NF10 (RNAseq) (Session et al., 2016; Xenbase); (Northern blot) (Hopwood et al., 1989); ISH (Frank and Harland, 1991).		sox17a represses myod1 (NF10.25, ISH) (Engleka et al., 2001).	sox17a/b MOs upregulate myod1 in activin-treated animal caps (NF10.5, RT-PCR) (Clements et al., 2003).			Represses		Regulation evidence: ++
					nodal4 (nodal homolog 4)	Xnr4	Transforming growth factor β related protein	NF9: Vegetal>Marginal (Agius et al., 2000). NF10/10.5: DMZ (Joseph and Melton, 1997).	Zygotic: ~NF9 (RT-PCR) (Takahashi et al,, 2000); RNAseq (Session et al., 2016; Xenbase).			sox17a/b MOs downregulate nodal4 (NF11, microarray, RT-qPCR) (Sinner et al., 2006).			Activates		Regulation evidence: +
					sox17a (SRY-box 17α)		HMG-box transcription factor	Gastrulation: vegetal + IMZ endoderm (Hudson et al., 1997).	Zygotic: ~NF8 (RT-PCR) (Yasuo and Lemaire, 1999). ~NF9 (RNAseq) (Session et al., 2016; Xenbase). ~NF9/10 (ISH) (Rousso et al., 2011) (Bates et al., 2013).	Gene reporter assay (NF10.5), ChIP-PCR (NF11) (Howard et al., 2007).	sox17b induces sox17a in animal caps (NF11, RT-PCR) (Sinner et al., 2004).	sox17a/b MOs decrease activity of a sox17a gene reporter (NF10.5) (Howard et al., 2007).		GR sox17b (Dex blastula stage) induces sox17a in animal caps even in the presence of CHX (NF11, RTq-PCR) (Sinner et al., 2004).	Activates	Direct	Binding evidence: + Regulation evidence: ++, CHX+
					tbxt (T-box transcription factor T)	brachyury, Xbra, t	T-box transcription factor	Late blastula (NF9.5): MZ (Aguirre et al., 2013). Gastrulation: Presumptive pre-involuted and involuting mesoderm in the IMZ. After involution, expression only persists in the notochord (Smith et al., 1991) (Essex et al., 1993) (Aguirre et al., 2013).	Maternal: Low levels (RNAse protection) (Smith et al., 1991). Zygotic: ~NF9-10 (RNAseq) (Session et al., 2016; Xenbase); RNAse protection (Smith et al., 1991).		sox17a represses tbxt cell-autonomously (NF10.25, ISH) (Engleka et al., 2001).	sox17a/b MOs upregulate tbxt in activin-treated animal caps (NF10.5, RT-PCR) (Clements et al., 2003).	sox17b-EnR increases tbxt expression in vegetal pole explants (NF32, RT-PCR) (Hudson et al., 1997).		Represses		Regulation evidence: +++

## Sheet: tbxt
Transcription factor	Alternative Names	Function	Expression domain	Activation stage	Target gene	Alternative names	Gene function	Gene expression domain	Gene activation stage	Binding Evidence	Regulation Evidence				Activate or Repress?	Direct Target	Strength of Connection
											Gain-of-Function	Loss-of-Function	Dominant Negative	Protein Synthesis Inhibition
tbxt (T-box transcription factor T)	brachyury, Xbra, t	T-box transcription factor	Late blastula (NF9.5): MZ (Aguirre et al., 2013). Gastrulation: Presumptive pre-involuted and involuting mesoderm in the IMZ. After involution, expression only persists in the notochord (Smith et al., 1991) (Essex et al., 1993) (Aguirre et al., 2013).	Maternal: Low levels (RNAse protection) (Smith et al., 1991). Zygotic: ~NF9-10 (RNAseq) (Session et al., 2016; Xenbase); RNAse protection (Smith et al., 1991).
					dll1 (delta-like 1)	delta1	Membrane-bound ligand for Notch receptors	Gastrulation: IMZ (preinvoluted) (Wittenberger et al., 1999) (López et al., 2005).	Maternal: Eggs (RNAseq) (Session et al., 2016). Zygotic: ~NF9 (RNAseq) (Session et al., 2016; Xenbase) ~NF10.5 (ISH) (López et al., 2005).	ChIP-seq NF11-12.5: several peaks of Tbxt occupancy in the dll1 gene region. See Figure S4, prepared from data obtained from Gentsch et al., 2013; Xenbase).						Direct	Binding evidence: +
					hes4 (hes family bHLH transcription factor 4)	hairy2	bHLH-Orange transcriptional repressor	Late blastula (NF9.5): animal hemisphere (Aguirre et al., 2013). Gastrulation: NIMZ (López et al., 2005) (Aguirre et al., 2013); presumptive DML: prechordal mesoderm and FP precursors (Tsuji et al., 2003) (López et al., 2005); neural plate border (presumptive neural crests) (Tsuji et al., 2003) (Vega López et al., 2015).	Maternal: Peak during oogenesis, lower expression in eggs (RNAseq) (Session et al., 2016; Xenbase). Zygotic: ~NF8 (RNAseq) (Session et al., 2016; Xenbase); ~NF10 (Northern blot) (Tsuji et al., 2003).		Overexpression of tbxt abolishes hes4 expression throughout the NIMZ in whole embryos at early gastrula (NF10.5, ISH) (Aguirre et al., 2013).		tbxt-EnR induces ectopic hes4 expression during gastrulation, expanding the NIMZ domain at the expense of the IMZ (NF11.5, ISH) (Aguirre et al., 2013).		Represses		Regulation evidence: ++
					myod1 (myogenic differentiation 1)		bHLH transcription factor	Gastrulation: non-organizer IMZ, involuted paraxial mesoderm (Frank and Harland, 1991).	Maternal: Oogenesis, peaks in eggs (RNAseq) (Session et al., 2016; Xenbase). Zygotic: ~NF10 (RNAseq) (Session et al., 2016; Xenbase); (Northern blot) (Hopwood et al., 1989); ISH (Frank and Harland, 1991).	ChIP-seq NF11-12.5:two regions of Tbxt occupancy in the myod1 gene region. See Figure S5, prepared from data obtained from Gentsch et al., 2013; Xenbase).		tbxt1 MO + tbxt2 MO decreased myod1 expression (paraxial mesoderm, NF12-12.5, ISH) (Gentsch et al., 2013).			Activates	Direct	Binding evidence: + Functional evidence: +

## Sheet: zeb2
Transcription factor	Alternative Names	Function	Expression domain	Activation stage	Target gene	Alternative names	Gene function	Gene expression domain	Gene activation stage	Binding Evidence	Regulation Evidence				Activate or Repress?	Direct Target	Strength of Connection
											Gain-of-Function	Loss-of-Function	Dominant Negative	Protein Synthesis Inhibition
zeb2 (zinc finger E-box binding homeobox 2)	sip1	δEF1/Zfh-1 two-handed Zinc finger-Homeodomain transcriptional repressor	Gastrulation: Dorsal ectoderm (presumptive neural ectoderm) from NF10.5 (ISH) (Eisaki et al., 2000) (Van Grunsven et al., 2000) (Papin et al., 2002).	Zygotic: ~NF9 (endpoint RT-PCR) (Eisaki et al. 2000)/NF10 (RNAseq) (Session et al., 2016; Xenbase) (RNAse protection, Van Grunsven et al., 2000). ~NF10.5 (ISH) (Eisaki et al., 2000).
					sox2 (SRY-box 2)		HMG-box transcription factor	Gastrulation: neural ectoderm (Mizuseki et al., 1998).	Zygotic: ~NF9 (RNAseq) (Session et al., 2016; Xenbase). ~NF10.5 (ISH) (Mizuseki et al., 1998).		Xenopus zeb2 activated sox2 in Xenopus animal caps (ISH, NF14). Xenopux zeb2-EnR activated sox2 in Xenopus animal caps (ISH, NF14) and whole embryos (ISH, NF11) (van Grunsven et al., 2007).		Xenopus zeb2-VP16 repressed sox2 in Xenopus animal caps in which BMP activity was blocked (ISH, NF14) and repressed it in whole embryos (ISH, NF11) (van Grunsven et al., 2007).		Indirect activation		Regulation evidence: ++
					sox17a (SRY-box 17α)		HMG-box transcription factor	Gastrulation: vegetal + IMZ endoderm (Hudson et al., 1997).	Zygotic: ~NF8 (RT-PCR) (Yasuo and Lemaire, 1999). ~NF9 (RNAseq) (Session et al., 2016; Xenbase). ~NF9/10 (ISH) (Rousso et al., 2011) (Bates et al., 2013).		Mouse Zeb2 overexpression did not affect sox17a expression in Xenopus (RNAse protection assay; NF10.5) (Papin et al., 2002).		Xzeb2-VP16 activated sox17a in animal caps (RNAse protection, NF10.5) (Papin et al., 2002).		Repression (probably requires a co-repressor).		Regulation evidence: +
					tbxt (T-box transcription factor T)	brachyury, Xbra, t	T-box transcription factor	Late blastula (NF9.5): MZ (Aguirre et al., 2013). Gastrulation: Presumptive pre-involuted and involuting mesoderm in the IMZ. After involution, expression only persists in the notochord (Smith et al., 1991) (Essex et al., 1993) (Aguirre et al., 2013).	Maternal: Low levels (RNAse protection) (Smith et al., 1991). Zygotic: ~NF9-10 (RNAseq) (Session et al., 2016; Xenbase); RNAse protection (Smith et al., 1991).	Gel retardation assay of Xenopus tbxt promoter sequence (containing two putative Zeb2 binding sites) with mouse Zeb2 (Verschueren et al., 1999). Mutation of zeb2 binding sites in the Xenopus tbxt promoter resulted in ectopic activation of tbxt in the ectoderm (ISH, NF11) (Remacle et al., 1999), (Lerchner et al., 2000).	mouse Zeb2 and Xenopus zeb2 overexpression: cell-autonomous repression of tbxt in Xenopus (ISH; RNAse protection; NF10.5-11) (Verschueren et al., 1999), (Papin et al., 2002), (Nitta et al, 2007).	zeb2 MO did not affect tbxt expression (ISH, NF11) (Nitta et al., 2004).	Xenopus zeb2-VP16 activated tbxt in animal caps (RNAse protection, NF10.5) (Papin et al., 2002).	Mouse Zeb2 overexpression in whole Xenopus embryos: repression of tbxt, even in the presence of CHX (ISH, RNAse protection; NF10,5) (Papin et al, 2002). Xenopus zeb2-VP16 in Xenopus animal caps: activation of tbxt, even in the presence of CHX (RNAse protection, NF10.5) (Papin et al., 2002).	Repression. The KD study suggests that other members of the Zeb2/Sip1 family of transcription factors might cooperate in repressing tbxt expression outside the IMZ.	Direct	Binding evidence: + Regulation evidence: ++, CHX+
